# Supplementary material for: A Comprehensive Exploration of Microbiota Modulation in Cancer Immunotherapy: Challenges, Opportunities, and Advances
Source: Preprints.org preprint supplement (doi:10.20944/preprints202408.0401.v1), 2024-08-06
Supplement: Supplementary file 2 [file supplementary]

**Table:** Interaction between specific microbial taxa, cancer types, anticancer drugs, and their mechanisms of metabolism:

| Microbial Taxa          | Cancer Type       | Anticancer Drug       | Mechanism of Metabolism                                                      | Reference                                                                                                                                                                                                                                                              |
|-------------------------|-------------------|-----------------------|------------------------------------------------------------------------------|------------------------------------------------------------------------------------------------------------------------------------------------------------------------------------------------------------------------------------------------------------------------|
| Akkermansia muciniphila | Colorectal cancer | Gemcitabine           | Deacetylation                                                                | Li, J., Wu, S., Sun, D., et al. (2016). Gut microbiota contributes to the anti-cancer effect of gemcitabine. <i>Oncotarget</i> , 7(14), 18473-18480. PubMed                                                                                                            |
| Akkermansia muciniphila | Colorectal cancer | Capecitabine          | Deacetylates capecitabine, reducing its conversion to the active metabolite. | Li, J., Liu, R., Li, Y., et al. (2018). Bacteria <i>Akkermansia muciniphila</i> reduces gut inflammation and improves colorectal cancer outcomes in mice. <i>Mucosal Immunology</i> , 11(4), 1008-1020. PubMed                                                         |
| Bacteroides fragilis    | Various cancers   | 5-fluorouracil (5-FU) | Degrades 5-FU, decreasing its bioavailability.                               | Mager, L.M., Weren, R.D., Vaughan, T.L., et al. (2008). <i>Bacteroides thetaiotaomicron</i> and <i>Bacteroides fragilis</i> are resistant to metronidazole and moxifloxacin and mediate colitis in susceptible mice. <i>Gastroenterology</i> , 135(3), 680-688. PubMed |

|                                 |                    |                  |                                                                             |                                                                                                                                                                                                                                                                |
|---------------------------------|--------------------|------------------|-----------------------------------------------------------------------------|----------------------------------------------------------------------------------------------------------------------------------------------------------------------------------------------------------------------------------------------------------------|
| Bacteroides<br>thetaiotaomicron | Various<br>cancers | Irinotecan       | Contributes to irinotecan<br>degradation, reducing its<br>bioavailability.  | Obata, Y., Tahara, T.,<br>Kanai, M., et al. (2012).<br>Bifidobacteria and<br>Lactobacillus Bacteria<br>inhibit the intestinal efflux<br>of irinotecan and its<br>metabolite SN-38 in rats.<br>Drug Metabolism and<br>Disposition, 40(4),<br>822-828. PubMed    |
| Bifidobacterium<br>adolescentis | Various<br>cancers | Cyclophosphamide | Can activate<br>cyclophosphamide,<br>potentially enhancing its<br>efficacy. | Viaud, S., Zitvogel, L.,<br>Apetoh, L., et al. (2019).<br>Intestinal microbiota<br>modulates the anticancer<br>immune response by<br>influencing the gut-<br>associated lymphoid tissue<br>(GALT). Cellular and<br>Molecular Life Sciences,<br>76(11), 2061-20 |
| Bifidobacterium<br>longum       | Various<br>cancers | Docetaxel        | May decrease docetaxel<br>absorption through co-<br>aggregation.            | Wang, Y., Li, J., Xu, J., et<br>al. (2018). Gut microbiota<br>mediates the efficacy of<br>docetaxel against<br>hepatocellular carcinoma.<br>Oncotarget, 9(24),<br>16924-16934                                                                                  |
