# Supplementary material for: A Comprehensive Exploration of Microbiota Modulation in Cancer Immunotherapy: Challenges, Opportunities, and Advances
Source: Preprints.org preprint supplement (doi:10.20944/preprints202408.0401.v1), 2024-08-06
Supplement: Supplementary file 3 [file supplementary]

| #  | NCT Number  | Study Title                                                                                                                                                | Study Status | Conditions                                                      | Intervention                                                                    |
|----|-------------|------------------------------------------------------------------------------------------------------------------------------------------------------------|--------------|-----------------------------------------------------------------|---------------------------------------------------------------------------------|
| 1  | NCT01468779 | Effect of Probiotics in Patients Undergoing Surgery for Periapullary Neoplasms                                                                             | COMPLETED    | Periapullary Carcinoma Nos                                      | DIETARY_SUPPLEMENT: Probiotics DIETARY_SUPPLEMENT: placebo                      |
| 2  | NCT05032027 | Oral Probiotics on Radiation Enteritis Stage II Induced by Pelvic Concurrent Chemoradiotherapy                                                             | RECRUITING   | Pelvic Cancer, Enteritis, Probiotics, Chemoradiotherapy         | OTHER: probiotics                                                               |
| 3  | NCT06186089 | Effect of Gastrectomy on Gut Microbiome and Cognitive Function                                                                                             | RECRUITING   | Perioperative Neurocognitive Disorders Gastric Cancer           | DIETARY_SUPPLEMENT: probiotics                                                  |
| 4  | NCT02771470 | Intestinal Microflora in Lung Cancer After Chemotherapy                                                                                                    | COMPLETED    | Lung Cancer Effects of Chemotherapy Tumor Immunity Malnutrition | DRUG: Probiotics DRUG: placebo                                                  |
| 5  | NCT01706393 | Effects of Probiotics Supplementation on Intestinal Microbiome in Malignancy Pts(Get Pelvic/Abdominal Rtx)                                                 | UNKNOWN      | Cancer                                                          | DIETARY_SUPPLEMENT: probiotics (s cultures) DIETARY_SUPPLEMENT: Placebo         |
| 6  | NCT00936572 | Probiotics In Colorectal Cancer Patients                                                                                                                   | COMPLETED    | Colorectal Cancer                                               | PROCEDURE: Probiotics (La1, BB536) BIOLOGICAL: placebo                          |
| 7  | NCT05773391 | Mechanism Exploration of Anti-HER-2 Small-molecule Tyrosine Kinase Inhibitor-related Diarrhea and Establishment of Prevention and Treatment Model(Measure) | RECRUITING   | Breast Cancer                                                   | DRUG: Take probiotics                                                           |
| 8  | NCT03773003 | Research for Pathophysiology of Cancer Related Fatigue (CRF) and Chronic Fatigue (CFS/ME)                                                                  | RECRUITING   | Cancer Related Fatigue Fatigue Syndrome, Chronic                | DIETARY_SUPPLEMENT: Probiotics DIETARY_SUPPLEMENT: placebo                      |
| 9  | NCT03853928 | Probiotics in the Prevention of Hepatocellular Carcinoma in Cirrhosis                                                                                      | UNKNOWN      | Microbiota Hepatocellular Carcinoma Cirrhosis                   | DIETARY_SUPPLEMENT: Probiotics                                                  |
| 10 | NCT03531606 | The Effects of Mechnikov Probiotics on Symptom and Surgical Outcome                                                                                        | COMPLETED    | Sigmoid Colon Cancer                                            | DRUG: Mechnikov probiotics DRUG: Placebo                                        |
| 11 | NCT01839721 | Impact of Probiotics BIFILACT® on Diarrhea in Patients Treated With Pelvic Radiation                                                                       | COMPLETED    | Cancer Diarrhea Abdominal Pain Quality of Life                  | DRUG: Bifilact® OTHER: placebo                                                  |
| 12 | NCT01723592 | Oral Administered Probiotics to Improve the Quality of the Vaginal Flora of Women With Breast Cancer and Chemotherapy.                                     | COMPLETED    | Breast Cancer                                                   | DIETARY_SUPPLEMENT: Probiotics DIETARY_SUPPLEMENT: placebo                      |
| 13 | NCT00197873 | Lactobacillus Rhamnosus in Prevention of Chemotherapy-related Diarrhoea                                                                                    | COMPLETED    | Colorectal Cancer                                               | DIETARY_SUPPLEMENT: Lactobacillus supplementation OTHER: Placebo administration |
| 14 | NCT03358511 | Engineering Gut Microbiome to Target Breast Cancer                                                                                                         | COMPLETED    | Breast Cancer                                                   | DIETARY_SUPPLEMENT: Probiotic                                                   |
| 15 | NCT06039644 | To Evaluate the Clinical Efficacy of Probiotics in Patients With the Breast Cancer                                                                         | RECRUITING   | Breast Cancer                                                   | DIETARY_SUPPLEMENT: Probiotic DIETARY_SUPPLEMENT: placebo                       |
| 16 | NCT03870607 | Prebiotics and Probiotics During Definitive Treatment With Chemotherapy-radiotherapy SCC of the Anal Canal (BISQUIT)                                       | RECRUITING   | Anal Cancer Squamous Cell                                       | DIETARY_SUPPLEMENT: prebiotics in                                               |
| 17 | NCT03785938 | Mucositis and Infection Reduction With Liquid                                                                                                              | UNKNOWN      | Pediatric Cancer                                                | DIETARY_SUPPLEMENT: Probiotic DIETARY_SUPPLEMENT: placebo                       |

| #  | NCT Number  | Study Title                                                                                                                              | Study Status       | Conditions                                                                                                | Interventions                                                                                                 |
|----|-------------|------------------------------------------------------------------------------------------------------------------------------------------|--------------------|-----------------------------------------------------------------------------------------------------------|---------------------------------------------------------------------------------------------------------------|
| 18 | NCT06508034 | Probiotics in Children With Cancer<br>Probiotics for the Prevention of Immunotherapy Induced Colitis in Patients Receiving Immunotherapy | NOT_YET_RECRUITING | Malignant Solid Neoplasm                                                                                  | PROCEDURE: Biospecimen Collection Immunotherapy<br>Freeze-Dried Lactic Acid Bacteria Probiotic Administration |
| 19 | NCT02169388 | Intestinal Microflora in Colorectal Cancer (CRC) After Chemotherapy                                                                      | UNKNOWN            | Gastrointestinal Neoplasms Colorectal Cancer Effects of Chemotherapy Tumor Immunity Malnutrition          | DRUG: Probiotic DRUG: placebo (for p                                                                          |
| 20 | NCT04342507 | Probiotics for Treatment of Chalazion in Adults<br>GRACE-trial: a Randomized Active-controlled Trial for                                 | COMPLETED          | Chalazion                                                                                                 | OTHER: conservative treatment DIETARY                                                                         |
| 21 | NCT05562518 | vulvovaginal atrophy in breast Cancer Patients on Endocrine Therapy.                                                                     | RECRUITING         | Vulvovaginal Atrophy Breast Cancer                                                                        | DRUG: Estrogen DRUG: dehydroepiandrosterone<br>probiotics DRUG: Moisturizer                                   |
| 22 | NCT03782428 | An Evaluation of Probiotic in the Clinical Course of Patients With Colorectal Cancer                                                     | COMPLETED          | Colorectal Cancer                                                                                         | DIETARY_SUPPLEMENT: Probiotic OTHER                                                                           |
| 23 | NCT04322500 | Probiotics for Chalaziosis Treatment in Children                                                                                         | COMPLETED          | Chalazion                                                                                                 | DIETARY_SUPPLEMENT: probiotics OTHER                                                                          |
| 24 | NCT03704727 | The Effects of Probiotics on Intestinal Permeability in Gastrointestinal Cancer Patients in Chemotherapy                                 | COMPLETED          | Intestinal Permeability Gastrointestinal Irritation Mucositis                                             | DIETARY_SUPPLEMENT: Probiotic                                                                                 |
| 25 | NCT05175833 | Oral Probiotics and Secondary Bacterial Pneumonia in Severe COVID-19                                                                     | COMPLETED          | COVID-19 Lower Respiratory Infection Microbial Colonization Severe COVID-19 Secondary Bacterial Pneumonia | COMBINATION_PRODUCT: Oral probiotics                                                                          |
| 26 | NCT01410955 | Prevention of Irinotecan Induced Diarrhea by Probiotics                                                                                  | COMPLETED          | Colorectal Cancer                                                                                         | DIETARY_SUPPLEMENT: Probiotic for Placebo                                                                     |
| 27 | NCT04025307 | Phase I Trial of bacTRL-IL-12 in Adult Subjects With Advanced, Treatment-refractory Solid Tumours                                        | TERMINATED         | Cancer - Solid Tumours                                                                                    | DRUG: bacTRL-IL-12                                                                                            |
| 28 | NCT04362826 | Study to Investigate Efficacy of a Novel Probiotic on the Bacteriome and Mycobiome of Breast Cancer                                      | NOT_YET_RECRUITING | Breast Cancer                                                                                             | BIOLOGICAL: Novel probiotic OTHER: Placebo                                                                    |
| 29 | NCT06088940 | The Chemo-Gut Probiotic Trial for Cancer Survivors                                                                                       | NOT_YET_RECRUITING | Cancer Psychosocial Problem Gastrointestinal Dysfunction                                                  | DIETARY_SUPPLEMENT: Multistrain Probiotic                                                                     |
| 30 | NCT06436976 | The Effect of Probiotics ATG-F4 in Cancer Patients                                                                                       | RECRUITING         | Pancreatic Cancer Colon Cancer                                                                            | DRUG: LT-002 (Lactobacillus reuteri ATCC 55969)                                                               |
| 31 | NCT05736315 | Use of a Fermented Dairy Beverage in Cervical Cancer Patients Undergoing Concurrent Chemoradiation Therapy                               | COMPLETED          | Cervical Cancer, Stage IIB                                                                                | OTHER: Placebo dairy beverage                                                                                 |
| 32 | NCT03177681 | The Effect of Yogurt in Cancer Patient With Moderate Gastrointestinal (GI) Symptoms                                                      | WITHDRAWN          | Malignant Neoplasms of Independent (Primary) Multiple Sites                                               | OTHER: Tongue Assessment OTHER: Stool Questionnaires DEVICE: Holter Monitor                                   |
| 33 | NCT03742596 | Effect of Probiotics Supplementation on the Side Effects of Radiation Therapy Among Colorectal Cancer Patients                           | WITHDRAWN          | Colorectal Cancer                                                                                         | DIETARY_SUPPLEMENT: Probiotic For Radiation Therapy                                                           |

| #  | NCT Number  | Study Title                                                                                                              | Study Status          | Conditions                                                                                  | Interventions                                                                                                                                                                                                                                                                                      |
|----|-------------|--------------------------------------------------------------------------------------------------------------------------|-----------------------|---------------------------------------------------------------------------------------------|----------------------------------------------------------------------------------------------------------------------------------------------------------------------------------------------------------------------------------------------------------------------------------------------------|
| 34 | NCT05544396 | Study on the Probiotics Regulating miRNA in H. Pylori-induced Wnt/ $\beta$ -catenin Gastric Carcinogenesis.              | RECRUITING            | H. Pylori Infection Carcinogenesis                                                          | OTHER: probiotic                                                                                                                                                                                                                                                                                   |
| 35 | NCT03760653 | Synergic Effects of Physical Activity and Probiotic on Gut Immune System and Quality of Life of Breast Cancer Survivors. | WITHDRAWN             | Breast Cancer Females                                                                       | OTHER: Physical Exercise and probiotic Probiotic group DIETARY_SUPPLEMENT: Placebo                                                                                                                                                                                                                 |
| 36 | NCT05316064 | Reducing Abundance of Human Papilloma Virus in Women by Taking Probiotic                                                 | WITHDRAWN             | Human Papilloma Virus Infection                                                             | BIOLOGICAL: probiotic OTHER: placebo                                                                                                                                                                                                                                                               |
| 37 | NCT03290651 | Probiotics and Breast Health                                                                                             | COMPLETED             | Breast Cancer Female                                                                        | DIETARY_SUPPLEMENT: Probiotic Na B DIETARY_SUPPLEMENT: Placebo                                                                                                                                                                                                                                     |
| 38 | NCT05254249 | Clinical Trial of Probiotic Supplementation in Psoriasis Vulgaris                                                        | UNKNOWN               | Psoriasis Vulgaris                                                                          | DRUG: Lactobacillus Plantarum IS-1050                                                                                                                                                                                                                                                              |
| 39 | NCT03072641 | Using Probiotics to Reactivate Tumor Suppressor Genes in Colon Cancer                                                    | COMPLETED             | Colon Cancer                                                                                | DIETARY_SUPPLEMENT: ProBion Clin                                                                                                                                                                                                                                                                   |
| 40 | NCT06496438 | Probiotics for Depression in Cancer Patients                                                                             | RECRUITING            | Depression Anxiety Disorder Probiotics Gastrointestinal Cancer Quality of Life Chemotherapy | DIETARY_SUPPLEMENT: Psychobiotic                                                                                                                                                                                                                                                                   |
| 41 | NCT02351089 | Probiotics in Radiation-treated Gynecologic Cancer                                                                       | TERMINATED            | Gastrointestinal Toxicity Gynecologic Cancer                                                | DIETARY_SUPPLEMENT: Capsules placebo Capsules probiotic powder and corn starch                                                                                                                                                                                                                     |
| 42 | NCT04871412 | The Thoracic Peri-Operative Integrative Surgical Care Evaluation Trial - Stage II                                        | RECRUITING            | Lung Cancer Gastric Cancer Esophageal Cancer                                                | DIETARY_SUPPLEMENT: Vitamin D3   Coriolus Versicolor DIETARY_SUPPLEMENT: Lemon DIETARY_SUPPLEMENT: Probiotic Pro12 DIETARY_SUPPLEMENT: Provit Protein DIETARY_SUPPLEMENT: Ther 2X DIETARY_SUPPLEMENT: Green Tea Recommendations OTHER: Physical Activity Recommendations BEHAVIORAL: Psychological |
| 43 | NCT02819960 | Prevention of Irinotecan Induced Diarrhea by Probiotics                                                                  | COMPLETED             | Diarrhea Cancer                                                                             | DRUG: Probio-Tec® BG-VCap-6.5 DRUG: Placebo                                                                                                                                                                                                                                                        |
| 44 | NCT03574051 | the Microbiota Are Associated With Iodine-131 Therapy and Hypothyroidism                                                 | UNKNOWN               | Microbiota                                                                                  | DRUG: Probiotic                                                                                                                                                                                                                                                                                    |
| 45 | NCT03922035 | CBM588 in Improving Clinical Outcomes in Patients Who Have Undergone Donor Hematopoietic Stem Cell Transplant            | ACTIVE_NOT_RECRUITING | Hematopoietic and Lymphoid Cell Neoplasm                                                    | OTHER: Best Practice DRUG: Clostridium Strain                                                                                                                                                                                                                                                      |
| 46 | NCT05032014 | Probiotics Enhance the Treatment of PD-1 Inhibitors in Patients With Liver Cancer                                        | UNKNOWN               | Liver Cancer                                                                                | OTHER: M9 OTHER: placebo                                                                                                                                                                                                                                                                           |
| 47 | NCT01895530 | Impact of Probiotics in Modulation of Intestinal Microbiota                                                              | COMPLETED             | Colorectal Cancer                                                                           | DIETARY_SUPPLEMENT: Saccharomyces                                                                                                                                                                                                                                                                  |
| 48 | NCT05220124 | A Study of Probiotics Administration in the Immunotherapy of Urothelial Bladder Carcinoma                                | RECRUITING            | Bladder Urothelial Carcinoma                                                                | DRUG: Live Combined (Bifidobacterium Capsules)                                                                                                                                                                                                                                                     |
| 49 | NCT03336840 | Effect of Metformin and Probiotics in Reproductive-aged Patients With Polycystic Ovary Syndrome                          | UNKNOWN               | Polycystic Ovary Syndrome                                                                   | DRUG: Metformin tablets DRUG: ProMetS Metformin tablets; 2. ProMetS probiotics                                                                                                                                                                                                                     |
| 50 | NCT02021253 | Influence of Probiotics Administration Before Liver Resection in Liver Disease                                           | COMPLETED             | Liver Fibrosis Liver Cirrhosis Permeability; Increased Hepatocellular Carcinoma             | DIETARY_SUPPLEMENT: Probiotic DIETARY_SUPPLEMENT: Placebo                                                                                                                                                                                                                                          |
| 51 | NCT03705442 | Probiotics as Adjuvant Therapy in the                                                                                    | UNKNOWN               | Colorectal Cancer Metastatic                                                                | DIETARY_SUPPLEMENT: Omni-Biotic                                                                                                                                                                                                                                                                    |

| #  | NCT Number  | Study Title                                                                                                                                | Study Status          | Conditions                                                                                                 | Intervention                                                                                                                                                                                                                              |
|----|-------------|--------------------------------------------------------------------------------------------------------------------------------------------|-----------------------|------------------------------------------------------------------------------------------------------------|-------------------------------------------------------------------------------------------------------------------------------------------------------------------------------------------------------------------------------------------|
| 52 | NCT01609660 | Treatment of Metastatic Colorectal Cancer<br>Impact of Probiotics on the Intestinal Microbiota                                             | COMPLETED             | Colorectal Cancer                                                                                          | DIETARY_SUPPLEMENT: Saccharomyces boulardii                                                                                                                                                                                               |
| 53 | NCT00517803 | Micronutrient Supplemented Probiotic Yogurt for HIV/AIDS and Other Immunodeficiencies                                                      | COMPLETED             | HIV Infections Cancer, Second Primary                                                                      | DIETARY_SUPPLEMENT: Probiotic Yogurt<br>micronutrients DIETARY_SUPPLEMENT: Probiotic Yogurt<br>micronutrients DIETARY_SUPPLEMENT: Probiotic Yogurt<br>micronutrients DIETARY_SUPPLEMENT: Probiotic Yogurt<br>micronutrients               |
| 54 | NCT01790035 | Probiotic LGG for Prevention of Side Effects in Patients Undergoing Chemoradiation for Gastrointestinal Cancer                             | TERMINATED            | Gastrointestinal Neoplasms                                                                                 | DRUG: LGG DRUG: Placebo                                                                                                                                                                                                                   |
| 55 | NCT06250075 | Effects of the Use of Probiotics on the Intestinal Microbiota of Patients With Gastric Cancer                                              | COMPLETED             | Gastric Adenocarcinoma Gastric Cancer Microbiome Cytokines Nutritional Status                              | DIETARY_SUPPLEMENT: Formulation intervention for Clinical Outcomes -G5                                                                                                                                                                    |
| 56 | NCT05109533 | Probiotics Role in HPV Cervico-vaginal Infection Clearance                                                                                 | COMPLETED             | Vaginal Infection HPV Infection                                                                            | OTHER: Lactobacillus rhamnosus BMX<br>Lactobacillus rhamnosus GR-1                                                                                                                                                                        |
| 57 | NCT04593459 | Probiotic Intervention in PCOS                                                                                                             | COMPLETED             | Polycystic Ovary Syndrome                                                                                  | DIETARY_SUPPLEMENT: Probiotic DF Hydrochloride DIETARY_SUPPLEMENT: Probiotic                                                                                                                                                              |
| 58 | NCT03420443 | Action of Synbiotics on Irradiated GI Mucosa in Rectal Cancer Treatment                                                                    | COMPLETED             | Rectal Cancer                                                                                              | DIETARY_SUPPLEMENT: Oat bran DII blueberry husks DIETARY_SUPPLEMENT: Oat bran                                                                                                                                                             |
| 59 | NCT03552458 | Effects of Probiotics in Preventing Oral Mucositis                                                                                         | UNKNOWN               | Head-and-neck Cancer                                                                                       | DRUG: Lactobacillus Reuteri Oral Solution                                                                                                                                                                                                 |
| 60 | NCT01644097 | Probiotic Supplementation in Preventing Treatment-Related Diarrhea in Patients With Cancer Undergoing Chemotherapy                         | WITHDRAWN             | Diarrhea Unspecified Adult Solid Tumor, Protocol Specific                                                  | DIETARY_SUPPLEMENT: Lactobacillus 299v DIETARY_SUPPLEMENT: Lactobacillus 299v<br>probiotic DIETARY_SUPPLEMENT: placebo<br>analysis OTHER: questionnaire administration<br>assessment DIETARY_SUPPLEMENT: Lactobacillus 299v<br>supplement |
| 61 | NCT05730777 | Correlation Between Myocardial Injury and Intestinal Flora Changes Associated With Oncology Drug Therapy and the Preventive of Probiotics  | NOT_YET_RECRUITING    | Cancer Therapy-related Cardiovascular Toxicity                                                             | DRUG: Bifidobacterium Bifidum Oral Capsules<br>Carboplatin DRUG: Paclitaxel DRUG: Atorvastatin                                                                                                                                            |
| 62 | NCT00319007 | Influence of Sulindac and Probiotics on the Development of Pouch Adenomas in Patients With Familial Adenomatous Polyposis                  | UNKNOWN               | Adenomatous Polyposis Coli                                                                                 | DRUG: Sulindac (drug) DRUG: VSL#3 (capsules)                                                                                                                                                                                              |
| 63 | NCT04784182 | Anti-anxiety Biotics for Breast Cancer Survivors                                                                                           | TERMINATED            | Anxiety Generalized Breast Cancer Female                                                                   | DIETARY_SUPPLEMENT: probiotic plus<br>supplement DIETARY_SUPPLEMENT: placebo                                                                                                                                                              |
| 64 | NCT03994055 | Effect of an Anti-inflammatory Diet on Patients With Cervical Cancer                                                                       | ACTIVE_NOT_RECRUITING | Cervical Cancer Uterine Cervical Neoplasm Pelvic Inflammatory Disease Radiation Toxicity Diet Modification | OTHER: Omega-3 fatty acids OTHER: A fiber OTHER: Probiotics OTHER: Lactose restriction OTHER: Fat restriction                                                                                                                             |
| 65 | NCT06398418 | R-5780-01 In Combination With PD-1 Checkpoint Inhibitors (Checkpoint Protein on Immune Cells Called T Cells) in Patients With Solid Tumors | NOT_YET_RECRUITING    | Solid Tumor, Adult Solid Tumor Melanoma Basal Cell Cancer Squamous Cell Cancer Adenoma                     | DRUG: R-5780                                                                                                                                                                                                                              |
| 66 | NCT06456229 | Time to Return of Bowel Function Following Perioperative Probiotics in Colorectal Cancer Surgery                                           | RECRUITING            | Colorectal Cancer Ileus Postoperative Flatus Diet, Healthy                                                 | DIETARY_SUPPLEMENT: Nestle Isocal Boost Optimum                                                                                                                                                                                           |
| 67 | NCT04009603 | Comparison of Probiotics, Metformin & Their Combination Therapy in the Treatment of PCOS                                                   | COMPLETED             | Polycystic Ovary Syndrome                                                                                  | DRUG: Probiotic Agent DRUG: Metformin                                                                                                                                                                                                     |
| 68 | NCT04857697 | Effects of Probiotics on the Gut Microbiome and                                                                                            | COMPLETED             | Anatomic Stage I Breast Cancer AJCC v8 Anatomic Stage II Breast Cancer AJCC                                | PROCEDURE: Biopsy PROCEDURE: Biopsy<br>Probiotic PROCEDURE: Therapeutic Colonoscopy                                                                                                                                                       |

| #  | NCT Number  | Study Title                                                                                                                                                                | Study Status       | Conditions                                                                                                                                               | Intervention                                                                   |
|----|-------------|----------------------------------------------------------------------------------------------------------------------------------------------------------------------------|--------------------|----------------------------------------------------------------------------------------------------------------------------------------------------------|--------------------------------------------------------------------------------|
|    |             | Immune System in Operable Stage I-III Breast or Lung Cancer                                                                                                                |                    | v8 Anatomic Stage III Breast Cancer AJCC v8 Breast Adenocarcinoma Stage I Lung Cancer AJCC v8 Stage II Lung Cancer AJCC v8 Stage III Lung Cancer AJCC v8 |                                                                                |
| 69 | NCT02751736 | The Effect Of Probiotics On Bowel Function Restoration After Ileostomy Closure In Patients With Rectal Cancer                                                              | UNKNOWN            | Rectal Cancer                                                                                                                                            | DIETARY_SUPPLEMENT: CJLP243 DI                                                 |
| 70 | NCT05901779 | Effect of Probiotic Supplements on Gastric Cancer Patients Receiving Neoadjuvant Chemotherapy                                                                              | RECRUITING         | Gastric Cancer Neoadjuvant Chemotherapy                                                                                                                  | DRUG: live combined Bifidobacterium, L                                         |
| 71 | NCT05939791 | Physical Exercise and Dairy Probiotics in Childhood Cancer Survivors                                                                                                       | COMPLETED          | Acute Lymphoblastic Leukemia, Pediatric                                                                                                                  | OTHER: Lactobacillus paracasei sub Physical exercise                           |
| 72 | NCT05592886 | A Novel Oral Synbiotic Formula in Reducing Adenoma Recurrence and Colorectal Neoplasia-related Bacterial Gene Markers                                                      | RECRUITING         | Colorectal Neoplasms Colorectal Adenoma Colorectal Cancer                                                                                                | OTHER: SMT04 formula OTHER: Activ                                              |
| 73 | NCT04131803 | Probiotics Combined With Standard Chemotherapy Plus Targeted Therapy in Patients With Metastatic Colorectal Cancer                                                         | NOT_YET_RECRUITING | Unresectable Metastatic Colorectal Cancer                                                                                                                | DRUG: Bifico combined with chemotherapy plus targeted therapy                  |
| 74 | NCT06001190 | The Influence of Oral Probiotic on the Vaginal Flora and Microenvironment Alteration in the Vaginosis Infection Women                                                      | RECRUITING         | Probiotic, Human Papillomavirus Infection, Pap Smear, Microbiome                                                                                         | DIETARY_SUPPLEMENT: probiotic:La                                               |
| 75 | NCT03940768 | The Use of Lactobacillus Plantarum 299v in Treatment of Cancer Patients Who Received Home Enteral Nutrition                                                                | COMPLETED          | Cancer                                                                                                                                                   | DIETARY_SUPPLEMENT: Lactobacillus 299v DIETARY_SUPPLEMENT: Placebo             |
| 76 | NCT04021589 | Chemotherapy w/wo WeiLeShu in Metastatic Colorectal Cancer                                                                                                                 | COMPLETED          | Microbial Colonization Colorectal Cancer                                                                                                                 | DRUG: Weileshu DRUG: Chemotherapy                                              |
| 77 | NCT01465802 | Study Of Dacomitinib (PF-00299804) In Advanced NSCLC Patients (Post Chemo Or Select First Line) To Evaluate Prophylactic Intervention On Derm And GI AEs And PRO           | COMPLETED          | Non Small Cell Lung Cancer (NSCLC)                                                                                                                       | DRUG: Dacomitinib DRUG: Dacomitinib Probiotic DRUG: Alclometasone cream        |
| 78 | NCT05271344 | Oral Immunonutrition With Synbiotics, Omega 3 and Vitamin D in Patients Undergoing Duodenopancreatectomy for Tumoral Lesion.                                               | RECRUITING         | Pancreatic Cancer Complication,Postoperative Surgery                                                                                                     | DIETARY_SUPPLEMENT: Nutritional F                                              |
| 79 | NCT05570942 | Oral Lactobacillus Rhamnosus TCELL-1 and Colorectal Cancer                                                                                                                 | UNKNOWN            | Staged III Colorectal Cancer Receiving Adjuvant Chemotherapy                                                                                             | DIETARY_SUPPLEMENT: Oral Lactob                                                |
| 80 | NCT02944617 | Probiotic Yogurt Supplement in Reducing Diarrhea in Patients With Metastatic Kidney Cancer Being Treated With Vascular Endothelial Growth Factor-Tyrosine Kinase Inhibitor | COMPLETED          | Diarrhea Metastatic Renal Cell Carcinoma Stage IV Renal Cell Cancer                                                                                      | OTHER: Laboratory Biomarker Analysis  Micronutrient-Fortified Probiotic Yogurt |
| 81 | NCT03518268 | Vivomixx for Prevention of Bone Loss in Women With Breast Cancer                                                                                                           | UNKNOWN            | Breast Cancer Osteoporosis, Osteopenia                                                                                                                   | DRUG: Vivomixx DRUG: Placebo                                                   |

| #  | NCT Number  | Study Title                                                                                                                                                                    | Study Status            | Conditions                                                                                                                                                                                             | Intervention                                                                                          |
|----|-------------|--------------------------------------------------------------------------------------------------------------------------------------------------------------------------------|-------------------------|--------------------------------------------------------------------------------------------------------------------------------------------------------------------------------------------------------|-------------------------------------------------------------------------------------------------------|
| 82 | NCT05094167 | Treated With an Aromatase Inhibitor Lactobacillus Bifidobacterium V9(Kex02)Improving the Efficacy of Carilizumab Combined With Platinum in Non-small Cell Lung Cancer Patients | UNKNOWN                 | Non-small Cell Lung Cancer                                                                                                                                                                             | OTHER: V9 OTHER: placebo                                                                              |
| 83 | NCT03829111 | CBM588, Nivolumab, and Ipilimumab in Treating Patients With Stage IV or Advanced Kidney Cancer                                                                                 | COMPLETED               | Advanced Renal Cell Carcinoma Clear Cell Renal Cell Carcinoma Metastatic Renal Cell Carcinoma Stage III Renal Cell Cancer AJCC v8 Stage IV Renal Cell Cancer AJCC v8 Unresectable Renal Cell Carcinoma | DRUG: Clostridium butyricum CBM 588 Ipilimumab BIOLOGICAL: Nivolumab                                  |
| 84 | NCT03642548 | Probiotics Combined With Chemotherapy for Patients With Advanced NSCLC                                                                                                         | UNKNOWN                 | Probiotics Plus Chemotherapy                                                                                                                                                                           | DRUG: bifico DRUG: placebo                                                                            |
| 85 | NCT01579591 | VSL#3 Versus Placebo in Increasing the Pathological Major Response Rate in Patients With Rectal Cancer                                                                         | UNKNOWN                 | Rectal Cancer                                                                                                                                                                                          | OTHER: VSL#3 OTHER: Placebo                                                                           |
| 86 | NCT01479907 | Synbiotics and Gastrointestinal Function Related Quality of Life After Colectomy for Cancer                                                                                    | COMPLETED               | Colorectal Neoplasms                                                                                                                                                                                   | DIETARY_SUPPLEMENT: Synbiotics D                                                                      |
| 87 | NCT06019312 | L. Plantarum 299v and Gut Microbiome, Diarrhoea, and Clostridioides Difficile Infection in Colorectal Cancer Patients                                                          | RECRUITING              | Colorectal Cancer Clostridioides Difficile Infection Diarrhea                                                                                                                                          | DIETARY_SUPPLEMENT: Sanprobi IB                                                                       |
| 88 | NCT04699721 | Clinical Study of Neoadjuvant Chemotherapy and Immunotherapy Combined With Probiotics in Patients With Potential/Resectable NSCLC                                              | ACTIVE_NOT_RECRUITING   | Non-small Cell Lung Cancer Stage III                                                                                                                                                                   | DRUG: nivolumab 4.5mg/kg+Paclitaxel ( Carboplatin AUC5                                                |
| 89 | NCT04688242 | Anal Dilatation Plus Probiotics Before Ileostomy Reduction for Low Anterior Resection Syndrome                                                                                 | UNKNOWN                 | Low Anterior Resection Syndrome                                                                                                                                                                        | OTHER: Anal dilatation per anus DRUG: (Clostridium butyricum TO-A; Bacillus n faecalisT-110) per anus |
| 90 | NCT06122636 | Efficacy of a Probiotic and Microbiological Analysis on Oral Complications Induced by Antineoplastic Therapies in Patients With HNC                                            | ENROLLING_BY_INVITATION | Quality of Life Oral Mucositis Dental Plaque Periodontal Diseases Xerostomia Dysbiosis                                                                                                                 | DIETARY_SUPPLEMENT: The probioti corresponds to PRODEFEN Plus manufac laboratory OTHER: Placebo       |
| 91 | NCT06199752 | Synergistic Immunomodulatory Effect of Synbiotics Pre and Postoperative Resection of Pancreatic Ductal Adenocarcinoma                                                          | COMPLETED               | Pancreatic Ductal Adenocarcinoma                                                                                                                                                                       | DIETARY_SUPPLEMENT: probiotic age ). Inulin capsules 1000mg Herbamama U                               |
| 92 | NCT06428422 | The Impact of Probiotic on Survival and Treatment Response in Metastatic Non-small Cell Lung Cancer Patients                                                                   | NOT_YET_RECRUITING      | Metastatic Non-small Cell Lung Cancer                                                                                                                                                                  | DIETARY_SUPPLEMENT: Bifidobacter 04 OTHER: Placebo                                                    |
| 93 | NCT04203459 | The Mechanism of Enhancing the Anti-tumor Effects of CAR-T on PC by Gut Microbiota Regulation                                                                                  | UNKNOWN                 | Pancreatic Cancer Gut Microbiota CAR-T                                                                                                                                                                 |                                                                                                       |
| 94 | NCT06245486 | Probiotic Lactobacillus Crispatus-M247 (Crispact®)                                                                                                                             | NOT_YET_RECRUITING      | Human Papillomavirus Infection                                                                                                                                                                         | DIETARY_SUPPLEMENT: Crispact® D                                                                       |

| #   | NCT Number  | Study Title                                                                                                                                                                                                        | Study Status          | Conditions                                                                                                                                                                                                                                                                                                                                                                                                                                                                      | Intervention                                                                                                                                                              |
|-----|-------------|--------------------------------------------------------------------------------------------------------------------------------------------------------------------------------------------------------------------|-----------------------|---------------------------------------------------------------------------------------------------------------------------------------------------------------------------------------------------------------------------------------------------------------------------------------------------------------------------------------------------------------------------------------------------------------------------------------------------------------------------------|---------------------------------------------------------------------------------------------------------------------------------------------------------------------------|
| 95  | NCT01473290 | Supplementation in the Sterilization of High-risk Human Papilloma (HPV-HR) Viruses Probiotic Therapy in Preventing Gastrointestinal Complications in Patients Undergoing Chemotherapy and Pelvic Radiation Therapy | WITHDRAWN             | Cognitive/Functional Effects Constipation, Impaction, and Bowel Obstruction Diarrhea Fatigue Gastrointestinal Complications Psychosocial Effects of Cancer and Its Treatment Unspecified Adult Solid Tumor, Protocol Specific                                                                                                                                                                                                                                                   | DIETARY_SUPPLEMENT: live freeze-d probiotic OTHER: placebo                                                                                                                |
| 96  | NCT04925700 | The Oral Microbiome in OSCC                                                                                                                                                                                        | COMPLETED             | Oral Cancer                                                                                                                                                                                                                                                                                                                                                                                                                                                                     | DIETARY_SUPPLEMENT: ProDentis L                                                                                                                                           |
| 97  | NCT05164887 | Microbiota Implementation to Reduce Anastomotic Colorectal Leaks (MIRACLE)                                                                                                                                         | COMPLETED             | Colorectal Cancer Surgery LAP Anastomotic Leak Microbial Substitution                                                                                                                                                                                                                                                                                                                                                                                                           | PROCEDURE: Laparoscopic colorectal r                                                                                                                                      |
| 98  | NCT05122546 | CBM588 in Combination With Nivolumab and Cabozantinib for the Treatment of Advanced or Metastatic Kidney Cancer                                                                                                    | ACTIVE_NOT_RECRUITING | Advanced Clear Cell Renal Cell Carcinoma Advanced Papillary Renal Cell Carcinoma Advanced Renal Cell Carcinoma Advanced Sarcomatoid Renal Cell Carcinoma Metastatic Clear Cell Renal Cell Carcinoma Metastatic Papillary Renal Cell Carcinoma Metastatic Renal Cell Carcinoma Metastatic Sarcomatoid Renal Cell Carcinoma Stage III Renal Cell Cancer AJCC v8 Stage IV Renal Cell Cancer AJCC v8 Unresectable Clear Cell Renal Cell Carcinoma Unresectable Renal Cell Carcinoma | DRUG: Cabozantinib S-malate DRUG: C Probiotic Strain BIOLOGICAL: Nivolum                                                                                                  |
| 99  | NCT00946283 | Lactobacillus in Preventing Infection in Patients Undergoing a Donor Stem Cell Transplant for Hematologic Cancer or Myelodysplastic Syndrome                                                                       | TERMINATED            | Breast Cancer Chronic Myeloproliferative Disorders Leukemia Lymphoma Multiple Myeloma and Plasma Cell Neoplasm Myelodysplastic Syndromes Myelodysplastic/Myeloproliferative Neoplasms Neuroblastoma Ovarian Cancer Testicular Germ Cell Tumor                                                                                                                                                                                                                                   | DIETARY_SUPPLEMENT: Lactobacillu                                                                                                                                          |
| 100 | NCT04874883 | Effect of the Use of Symbiotics in Patients With Colon Cancer                                                                                                                                                      | UNKNOWN               | Symbiotic Cancer Colorectal Cancer Head Neck Intestinal Dysbiosis Diarrhea Intestinal Microbiota Nutritional Status                                                                                                                                                                                                                                                                                                                                                             | DIETARY_SUPPLEMENT: Simbyotic D                                                                                                                                           |
| 101 | NCT02575391 | The Effects of Whole Food Intervention on Mucositis in Patients Treated for Thoracic Cancer                                                                                                                        | TERMINATED            | Esophagitis                                                                                                                                                                                                                                                                                                                                                                                                                                                                     | DIETARY_SUPPLEMENT: Whole Food                                                                                                                                            |
| 102 | NCT02575313 | The Effects of Whole Food Intervention on Mucositis in Patients Treated for Head and Neck Cancer                                                                                                                   | TERMINATED            | Mucositis                                                                                                                                                                                                                                                                                                                                                                                                                                                                       | DIETARY_SUPPLEMENT: Whole Food                                                                                                                                            |
| 103 | NCT03843736 | The Role of Dysbiosis of Gut Microbiota in the Pathogenesis of PCOS.                                                                                                                                               | UNKNOWN               | Polycystic Ovary Syndrome                                                                                                                                                                                                                                                                                                                                                                                                                                                       | BEHAVIORAL: Lifestyle intervention DI contraceptive                                                                                                                       |
| 104 | NCT06055894 | A Study of a Plant-Based Diet and Dietary Supplements in People With Smoldering Multiple Myeloma (SMM)                                                                                                             | RECRUITING            | Multiple Myeloma, Smoldering                                                                                                                                                                                                                                                                                                                                                                                                                                                    | DIETARY_SUPPLEMENT: Omega-3 DI Curcumin DIETARY_SUPPLEMENT: P based diet (WFPBD)                                                                                          |
| 105 | NCT05079503 | Gut Microbiome and Its Immune Modulation in Locally Advanced Rectal Cancer                                                                                                                                         | UNKNOWN               | Locally Advanced Rectal Cancer                                                                                                                                                                                                                                                                                                                                                                                                                                                  | DRUG: GEN-001                                                                                                                                                             |
| 106 | NCT04670393 | Antioxidant Supplement Associated With Oral Probiotics in Patients With PCOS in IVF                                                                                                                                | UNKNOWN               | Infertility, Female Polycystic Ovary Syndrome                                                                                                                                                                                                                                                                                                                                                                                                                                   | DIETARY_SUPPLEMENT: FertyBiotic '                                                                                                                                         |
| 107 | NCT05776940 | Probiotic Supplementation Reduces Gastrointestinal Symptoms During the Therapy and Improves Therapeutic Response in AL Amyloidosis                                                                                 | NOT_YET_RECRUITING    | Immunoglobulin Light-chain Amyloidosis                                                                                                                                                                                                                                                                                                                                                                                                                                          | DRUG: Live Combined Bacillus Subtilis coated Capsules combined with Bortezomib+Dexamethasone/Bortezomib Daratumumab DRUG: Bortezomib+Dexamethasone/Bortezomib Daratumumab |

| #   | NCT Number  | Study Title                                                                                                                      | Study Status            | Conditions                                                                    | Intervention                                                                                                                                                                                                                                       |
|-----|-------------|----------------------------------------------------------------------------------------------------------------------------------|-------------------------|-------------------------------------------------------------------------------|----------------------------------------------------------------------------------------------------------------------------------------------------------------------------------------------------------------------------------------------------|
| 108 | NCT03325023 | Effect of Dietary Modification on Microbiota in Overweight and Obese Polycystic Ovary Syndrome Patients                          | UNKNOWN                 | PCOS                                                                          | DIETARY_SUPPLEMENT: Dietary and Sanprobi Super Formula OTHER: Placebo                                                                                                                                                                              |
| 109 | NCT02544685 | Prevention of Febrile Neutropenia by Synbiotics in Pediatric Cancer Patients                                                     | UNKNOWN                 | Febrile Neutropenia Neutropenia Infection in an Immunocompromised Host Cancer | DIETARY_SUPPLEMENT: Probio-Fix 1 Beneo Synergy 1 OTHER: Placebo                                                                                                                                                                                    |
| 110 | NCT06270992 | Oral Microbiome Diagnostics of Lung Cancer                                                                                       | RECRUITING              | Lung Cancer                                                                   | DIAGNOSTIC_TEST: NCCN (National Comprehensive Cancer Network) guidelines for diagnosis                                                                                                                                                             |
| 111 | NCT04647045 | An Evaluation of Cultured Milk Drink on Immune Status of Patients With Irritable Bowel Syndrome: Constipation Predominant        | COMPLETED               | Irritable Bowel Syndrome With Constipation                                    | DIETARY_SUPPLEMENT: Cultured milk drink                                                                                                                                                                                                            |
| 112 | NCT06390176 | Lactobacillus Rhamnosus GG Alleviates Oral Mucositis in Patients Undergoing Radiotherapy                                         | RECRUITING              | Oral Mucositis                                                                | DIETARY_SUPPLEMENT: Lactobacillus powder DIETARY_SUPPLEMENT: Placebo Radiotherapy                                                                                                                                                                  |
| 113 | NCT05030090 | Integrative Nutrition Care Plan for the Patient With Liver and Colorectal Cancer                                                 | COMPLETED               | Malnutrition Cancer of Colon Cancer of Liver Nutrition Aspect of Cancer       | BEHAVIORAL: Nutritional consultant DIETARY_SUPPLEMENT: High-calorie, high-protein liquid supplement + High-calorie, high-protein liquid supplement COMBINATION_PRODUCT: High-calorie, high-protein liquid supplement + Powdered supplement 1 and 2 |
| 114 | NCT04527055 | The Efficacy of 10-day and 14-day Bismuth-based Quadruple Therapy in First-line H. Pylori Eradication                            | ENROLLING_BY_INVITATION | Helicobacter Pylori Infection Dysbiosis Probiotics                            | DRUG: Bismuth Subcitrate 120 MG Oral Lactobacillus acidophilus and Bifidobacterium lactis 40mg DRUG: Esomeprazole 40mg DRUG: Metronidazole 500mg                                                                                                   |
| 115 | NCT05527301 | HEM1036 Phase 2 Study in Low Anterior Resection Syndrome                                                                         | NOT_YET_RECRUITING      | LARS - Low Anterior Resection Syndrome                                        | DRUG: Lactobacillus Fermentum DRUG: Placebo                                                                                                                                                                                                        |
| 116 | NCT04029805 | Evaluation of a Combination of a Plant Extract and a Probiotic on Glucidic Metabolism in Women With PCOS and High Insulin Levels | UNKNOWN                 | Polycystic Ovarian Syndrome Insulin Resistance                                | COMBINATION_PRODUCT: Combination of Plant Extract and Probiotic COMBINATION_PRODUCT: Placebo Lactobacillus BSL_PS6 COMBINATION_PRODUCT: Placebo                                                                                                    |
| 117 | NCT05717972 | Effects of Kombucha Intervention on Emotional Distress and Sleep Quality in Breast Cancer Survivors                              | RECRUITING              | Distress, Emotional Sleep                                                     | OTHER: Kombucha                                                                                                                                                                                                                                    |
| 118 | NCT03902301 | Lactobacillus Rhamnosus and PCOS Treatment                                                                                       | COMPLETED               | Insulin Resistance Polycystic Ovary Syndrome Hyperandrogenism Obesity         | DIETARY_SUPPLEMENT: Lactobacillus Dietary group                                                                                                                                                                                                    |
| 119 | NCT06401447 | TPF Concurrent Chemo-radiotherapy Plus Immunotherapy for Local Advanced Esophageal Squamous Cell Carcinoma                       | RECRUITING              | Esophageal Squamous Cell Carcinoma                                            | RADIATION: Radiotherapy                                                                                                                                                                                                                            |
| 120 | NCT03720015 | Concurrent Training and Nutritional Management in Cancer                                                                         | COMPLETED               | Body Weight Changes                                                           | BEHAVIORAL: Physical exercise DIETARY_SUPPLEMENT: Nutritional management                                                                                                                                                                           |
| Sum |             |                                                                                                                                  |                         |                                                                               |                                                                                                                                                                                                                                                    |
